# Supplementary material for: Excited state dynamics of normal dithienylethene molecules either isolated or deposited on an argon cluster
Source: Royal Society of Chemistry journal article supplement (doi:10.1039/d1cp05729d), 2022-01-01
Supplement: d1cp05729d4.pdf [file d1cp05729d4.pdf]

Cite this: DOI: 10.1039/xxxxxxxxxx

## Excited state dynamics of normal dithienylethene molecules either isolated or deposited on argon cluster - ESI

Aude Lietard,<sup>a,b</sup> Giovanni Piani,<sup>a,c</sup> Rodolphe Pollet,<sup>d</sup> Benoît Soep<sup>a,e</sup>, Jean-Michel Mestdagh<sup>a</sup>, and Lionel Poisson<sup>\*a,e</sup>

Received Date  
Accepted Date

DOI: 10.1039/xxxxxxxxxx

www.rsc.org/journalname

### 1 Energy resolved photoelectron signals of free BTF6 and free PTF6

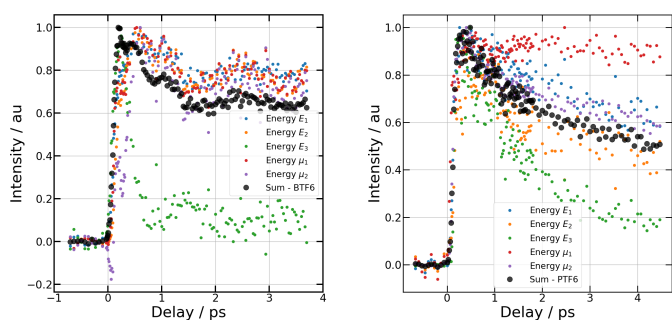

Fig. S 1 Energy resolved PE signal as a function of the time delay between the pump(265 nm) and probe (795 nm) laser pulses for free BTF6 (left panel) and free PTF6 (right panel). The experimental points labeled fit 1 to fit 4 refer to the intensity of the functions (the three exponentials and the Gaussian function, respectively) defined in the main text to fit the PE signals. The grey dots represent the total PE signal. All the curves are normalized at their maximum.

### 2 Photoion and photoelectron signals of free BTF6

To make the oscillation regime in BTF6 more apparent than in Figs.3 (top left panel) and 5 (bottom panel) of the main paper, the present Fig. 2 shows the BTF6 data along an expanded horizontal scale.

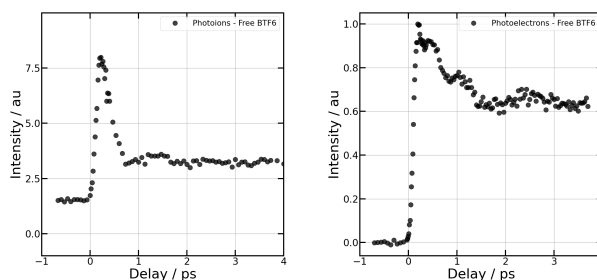

Fig. S 2 Parent PI signal (left panel) and total PE signal (right panel) as a function of the time delay between the pump(265 nm) and probe (795 nm) laser pulses for free BTF6.

<sup>a</sup>Université Paris-Saclay, CEA, CNRS, LIDYL, 91191, Gif-sur-Yvette, France. E-mail: lionel.poisson@universite-paris-saclay.fr

<sup>b</sup>Present address: Department of Chemistry, Durham University, Durham DH1 3LE, United Kingdom

<sup>c</sup>Present address: ??

<sup>d</sup>Université Paris-Saclay, CEA, CNRS, NIMBE, 91191, Gif-sur-Yvette, France.

<sup>e</sup>Université Paris-Saclay, CNRS, Institut des Sciences Moléculaires d'Orsay, 91405, Orsay, France
