# Supplementary figures and images for: Excited state dynamics of normal dithienylethene molecules either isolated or deposited on an argon cluster
Source: Royal Society of Chemistry journal article supplement (doi:10.1039/d1cp05729d), 2022-01-01

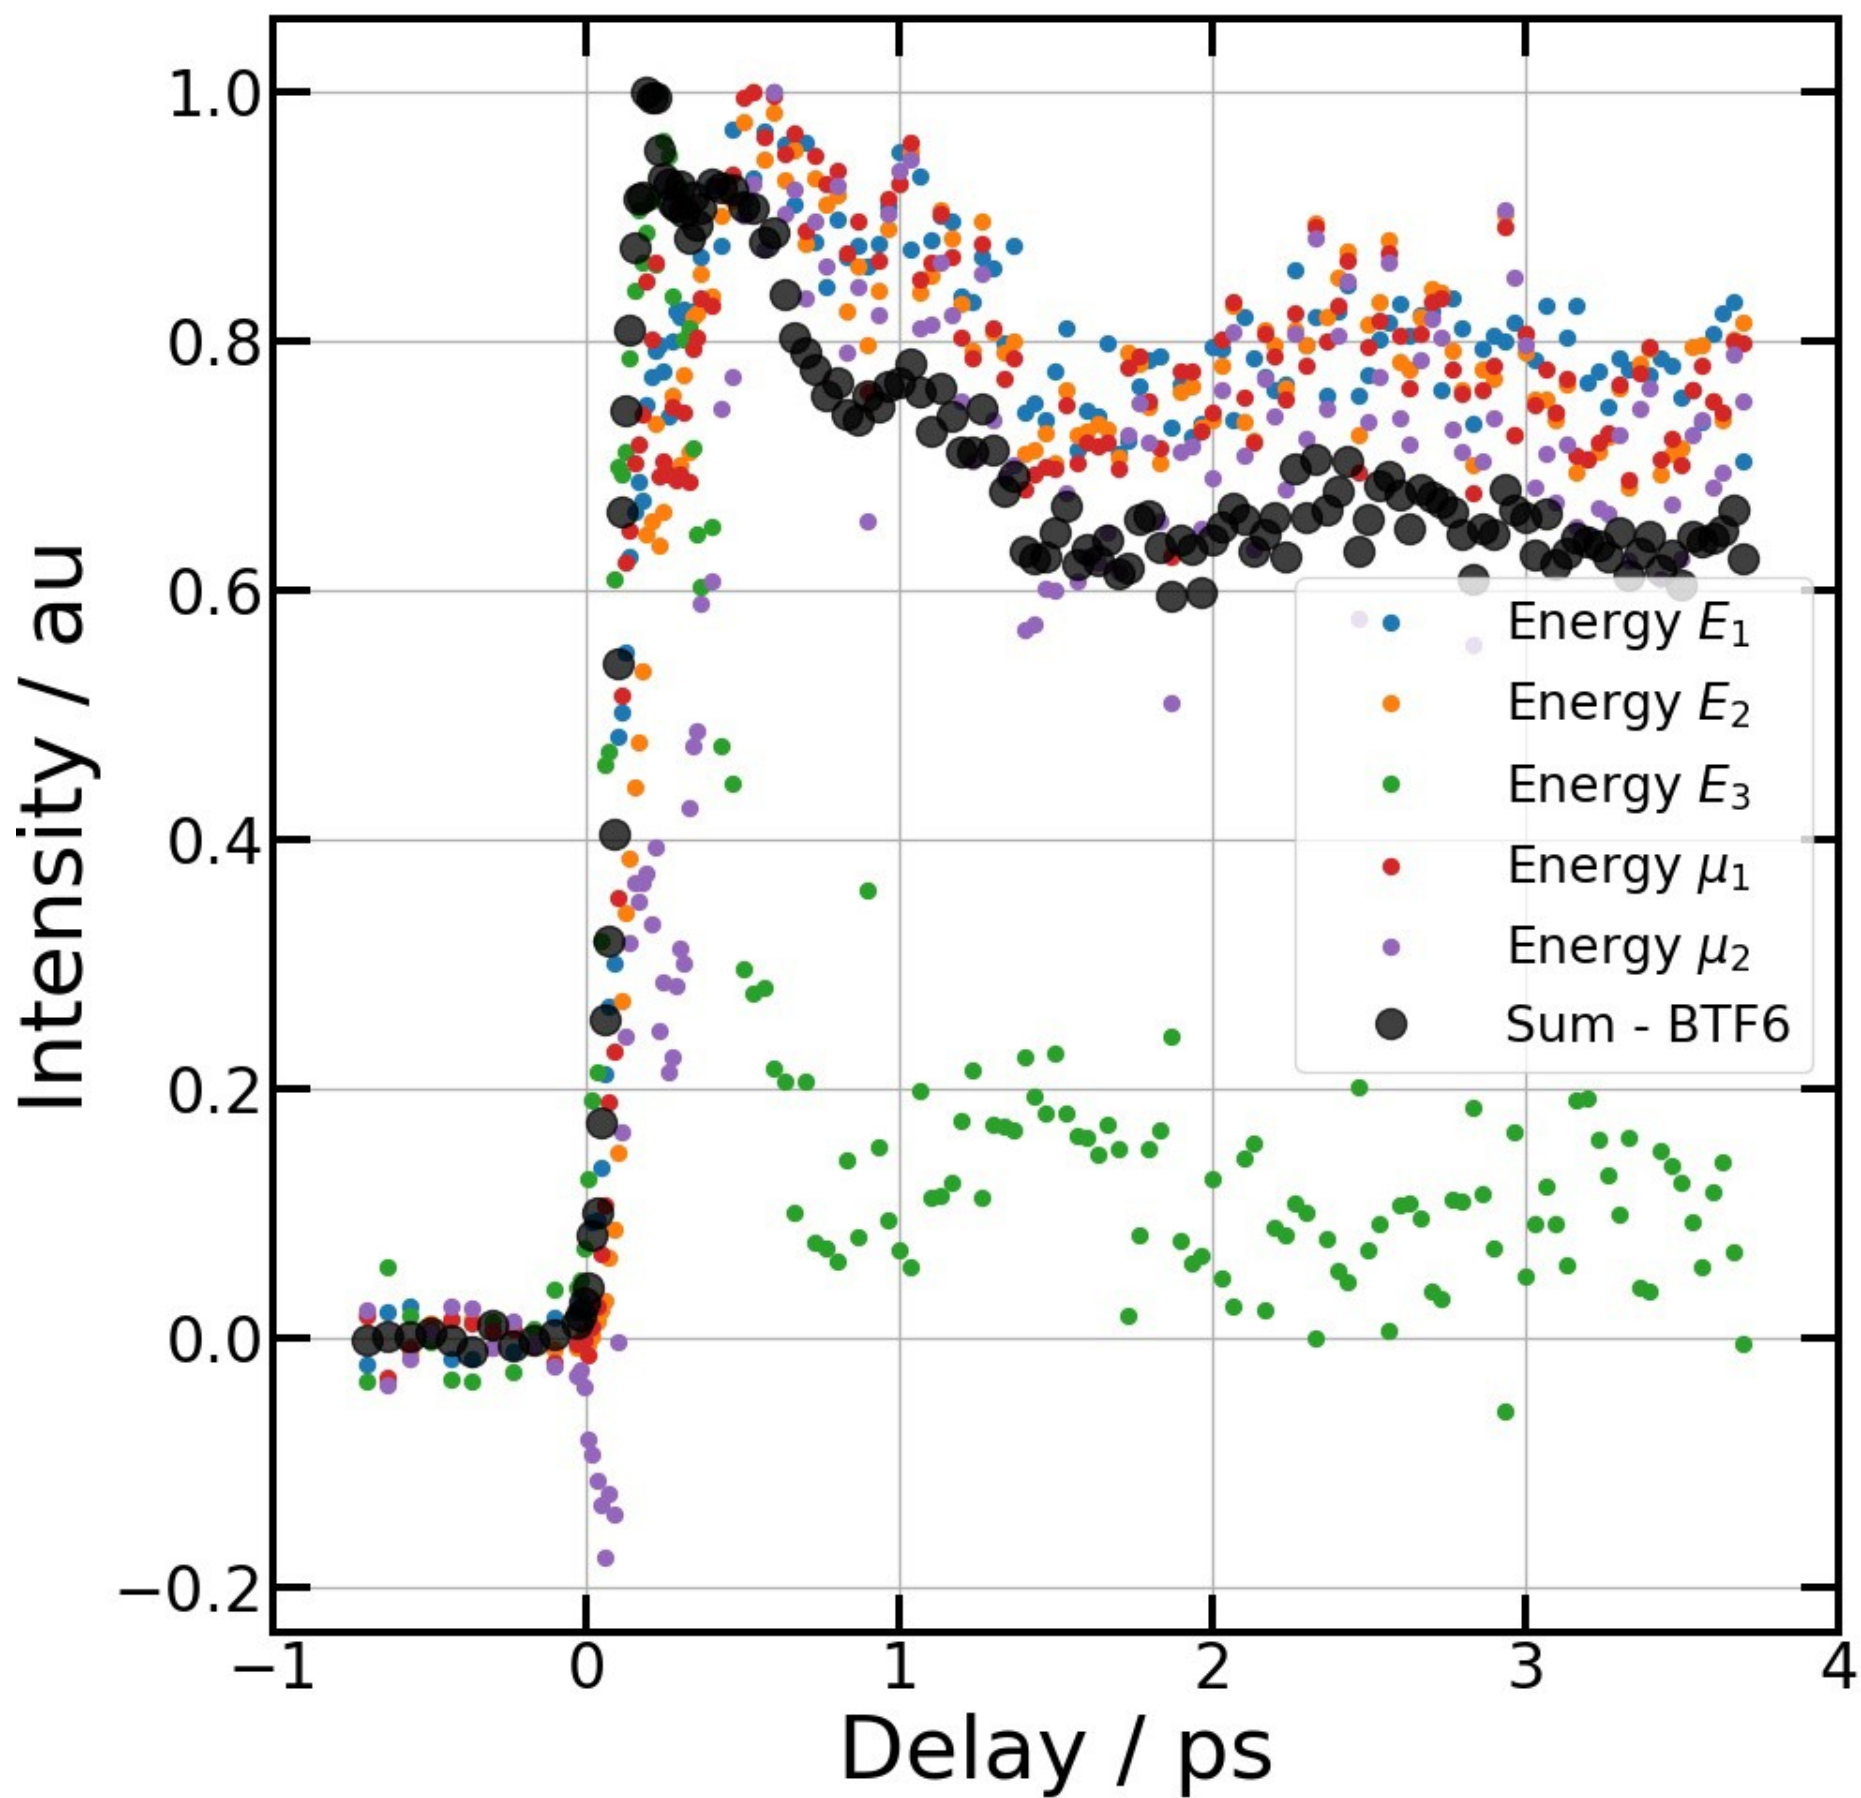

Supplement: d1cp05729d1.pdf [file d1cp05729d1.pdf]

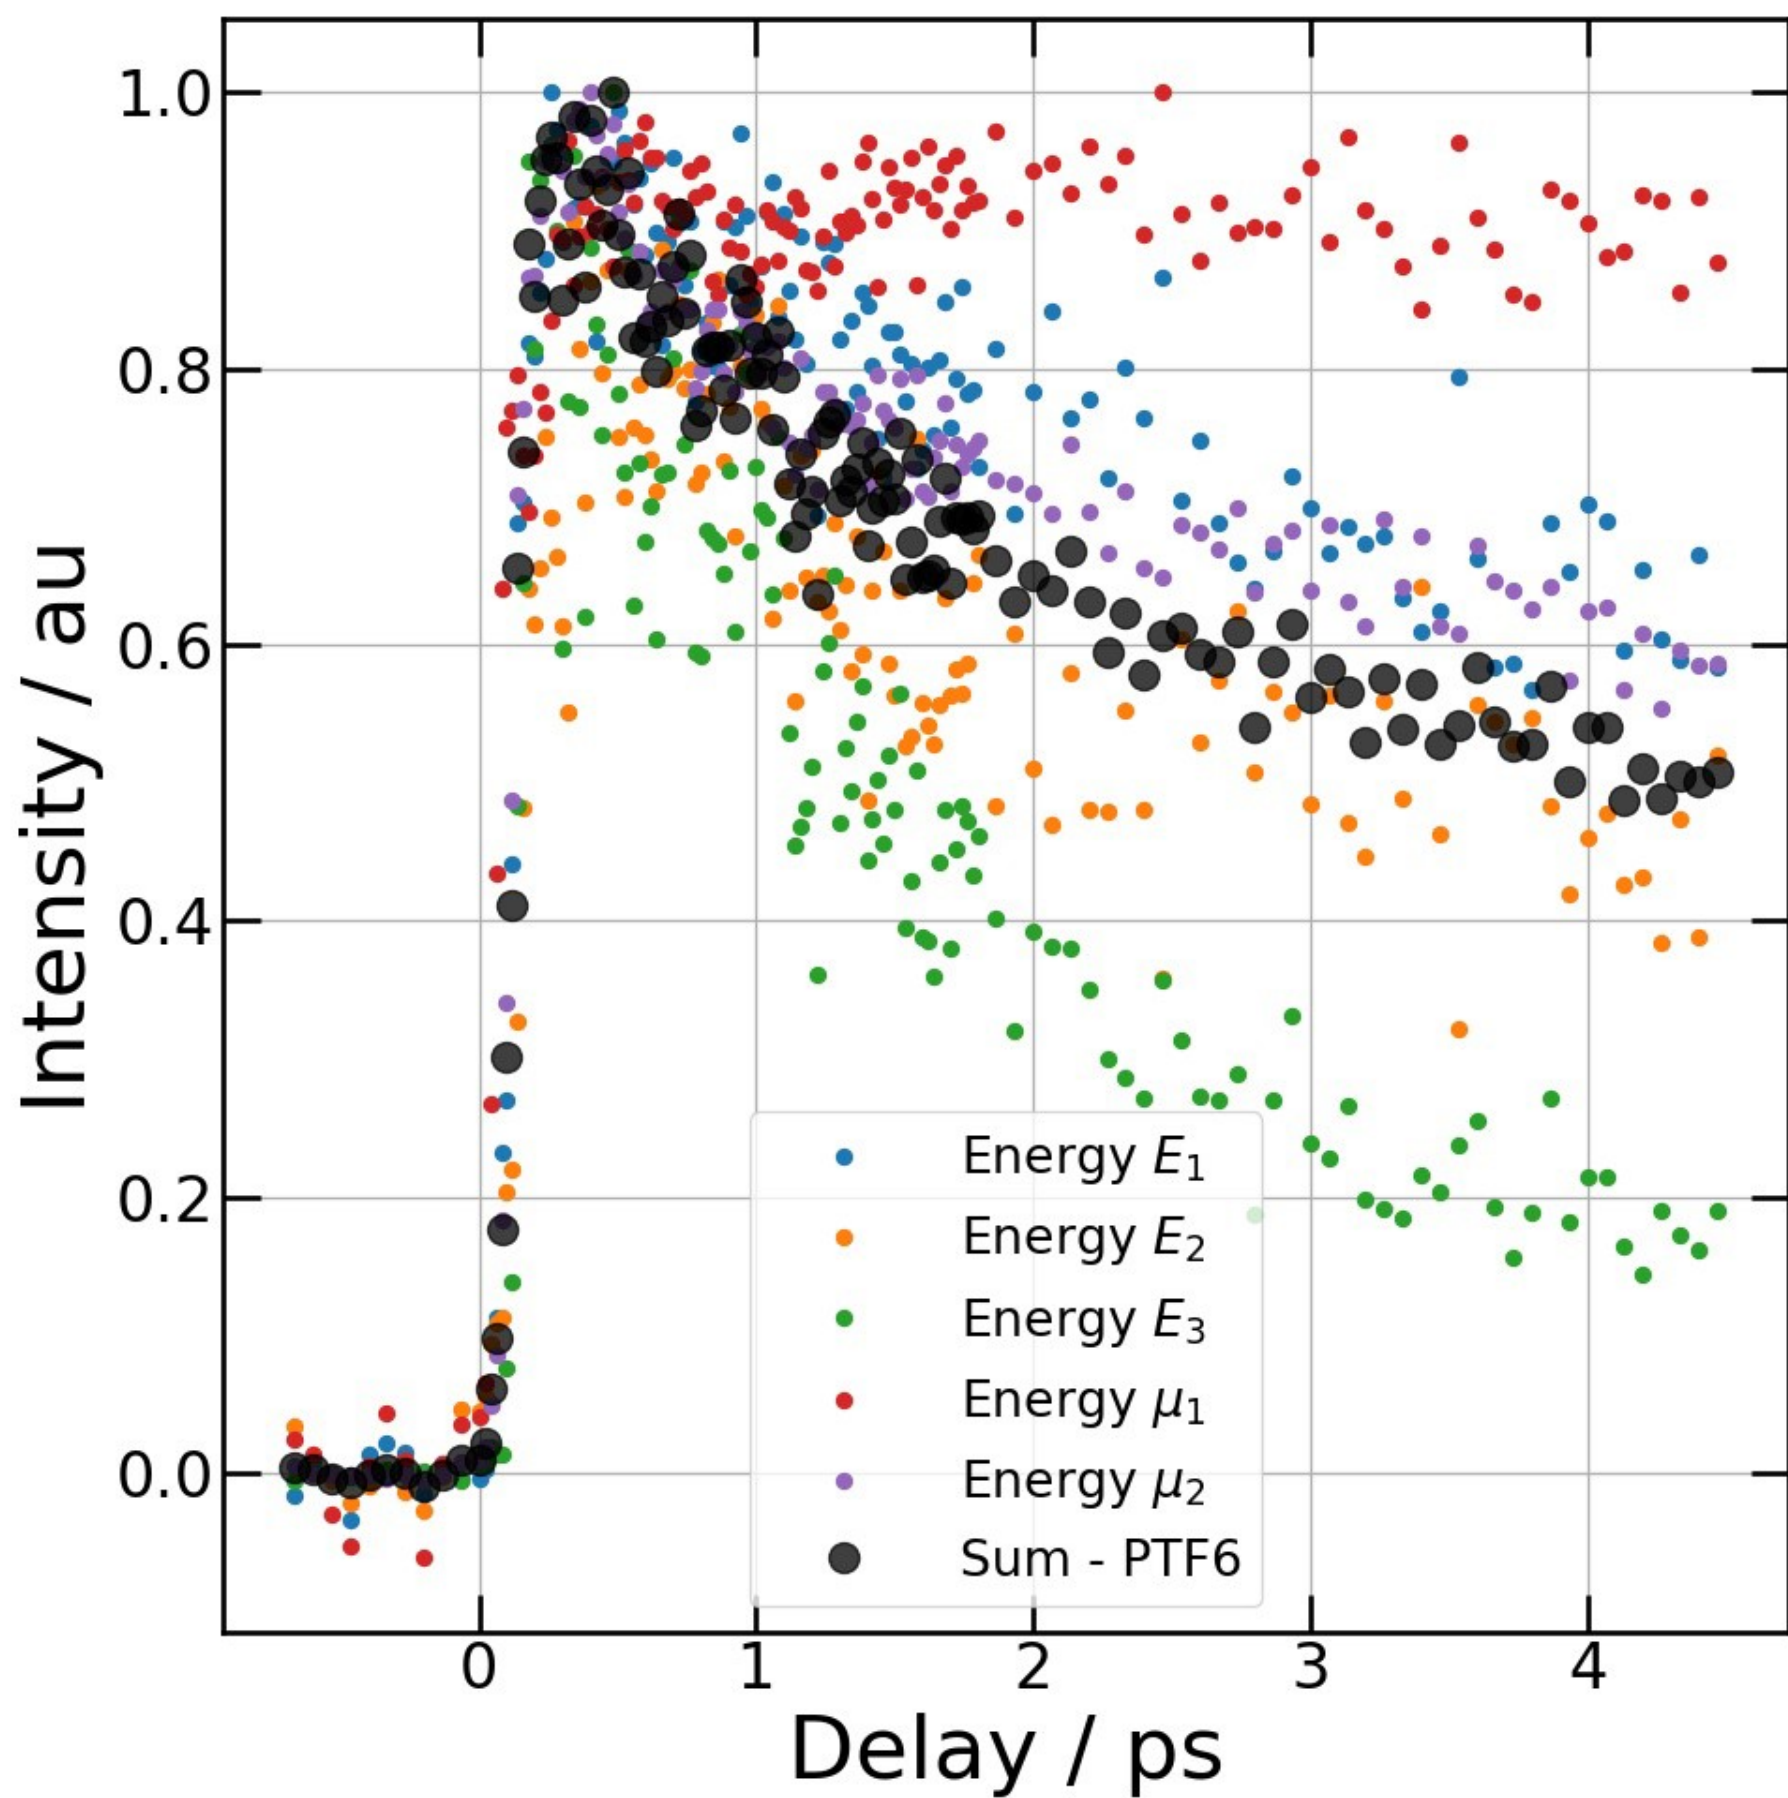

Supplement: d1cp05729d2.pdf [file d1cp05729d2.pdf]
